# Supplementary material for: Knowledge of and adherence to radiographic guidelines for low back pain: a survey of chiropractors in Newfoundland and Labrador, Canada
Source: Chiropr Man Therap. 2021 Jan 18;29:4. doi: 10.1186/s12998-020-00361-2 (PMC7812732; doi:10.1186/s12998-020-00361-2)
Supplement: Supplementary file 1 — Additional file 1. [file 12998_2020_361_MOESM1_ESM.zip]

Archive with 2 entries (2 files):
- 12998_2020_361_MOESM1_ESM.pdf
- Supplementary Material 1_Changes from the Jenkins Survey_ESM.docx
